# Supplementary material for: Geminin is partially localized to the centrosome and plays a role in proper centrosome duplication
Source: PubMed Central journal article supplement — Biol Cell. 2009 Mar 10;101(Pt 5):273–85. doi: 10.1042/BC20080109 (PMC2782310; doi:10.1042/bc20080109), 2009-03-10
Supplement: boc1010273add.pdf [file boc1010273add.pdf]

## Supplementary online data

# Geminin is partially localized to the centrosome and plays a role in proper centrosome duplication

Fei Lu\*†, Rongfeng Lan\*‡, Hongyin Zhang‡, Qing Jiang\* and Chuanmao Zhang\*<sup>1</sup>

\*The MOE Key Laboratory of Cell Proliferation and Differentiation and the State Key Laboratory of Bio-membrane and Membrane Bio-engineering, College of Life Sciences, Peking University, Beijing 100871, China, †School of Medicine, Shihezi University, Xinjiang 832000, China, and ‡The University Hospital, Peking University, Beijing 100871, China

### Figure S1 | Centrosomal co-localization of geminin and Arp1 in MDA-MB-231 and MEF cell lines

(A and B) Centrosomes were purified from MDA-MB-231 and MEF cells as described in the Materials and methods section of the main text. The presence of geminin (Gem) and Arp1 were tested by immunoblotting using antibodies against geminin and Arp1.  $\gamma$ -Tubulin ( $\gamma$ -tub) was used as a control for centrosomes. (C and D) Immunofluorescence staining was performed using antibodies against geminin (Gem) and Arp1. MDA-MB-231 and MEF cells were fixed with ice-cold methanol, and geminin and Arp1 were shown to be co-localized in centrosomes and spindle fibres/poles. Scale bar = 10  $\mu$ m.

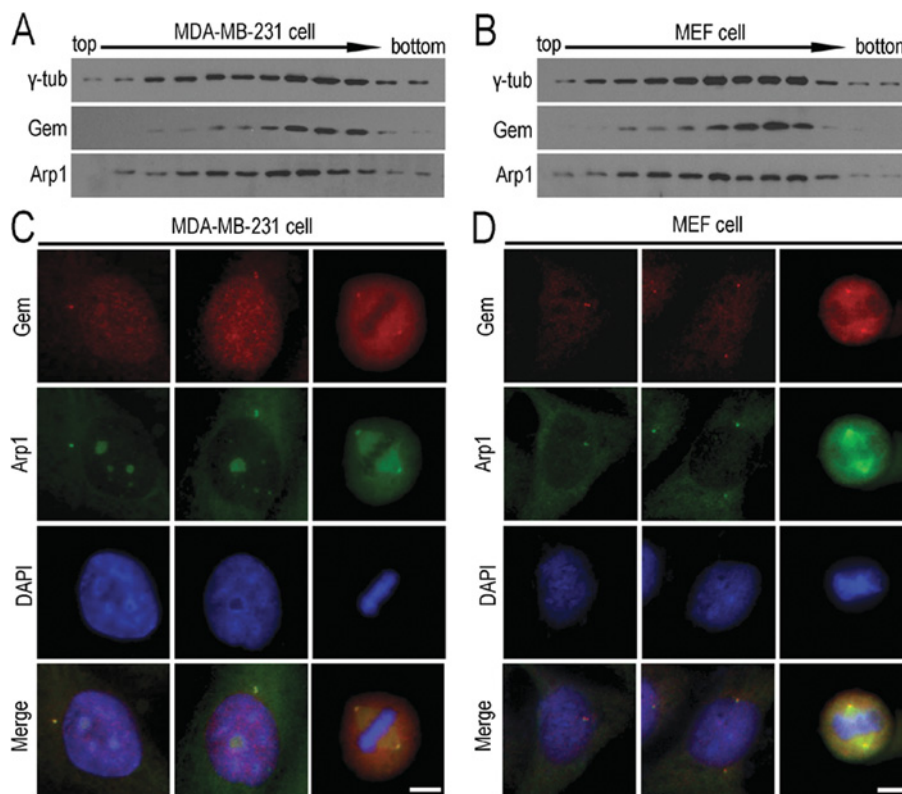

<sup>1</sup>To whom correspondence should be addressed (email zhangcm@pku.edu.cn).

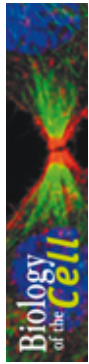

**Figure S2 | Disruption of the dynein–dynactin complex by overexpressed exogenous dynamitin/p50 impairs geminin and Arp1 centrosomal localization in both MDA-MB-231 and MEF cells**

A GFP–dynamitin/p50 vector was introduced into MDA-MB-231 and MEF cells using Lipofectamne™ 2000. At 24 h post transfection, the cells were fixed with ice-cold methanol and immunostained using antibodies against Arp1 and geminin. The disruption of Arp1 and geminin localization on the centrosome was observed in the cells expressing dynamitin/p50 in a concentration-dependent manner. In dynamitin/p50 low-expressing cells, geminin and Arp1 were normally localized on the centrosome/spindle poles, whereas when dynamitin/p50 was overexpressed, centrosomal/spindle pole localization of both geminin and Arp1 were remarkably disrupted. Scale bar = 10  $\mu$ m.

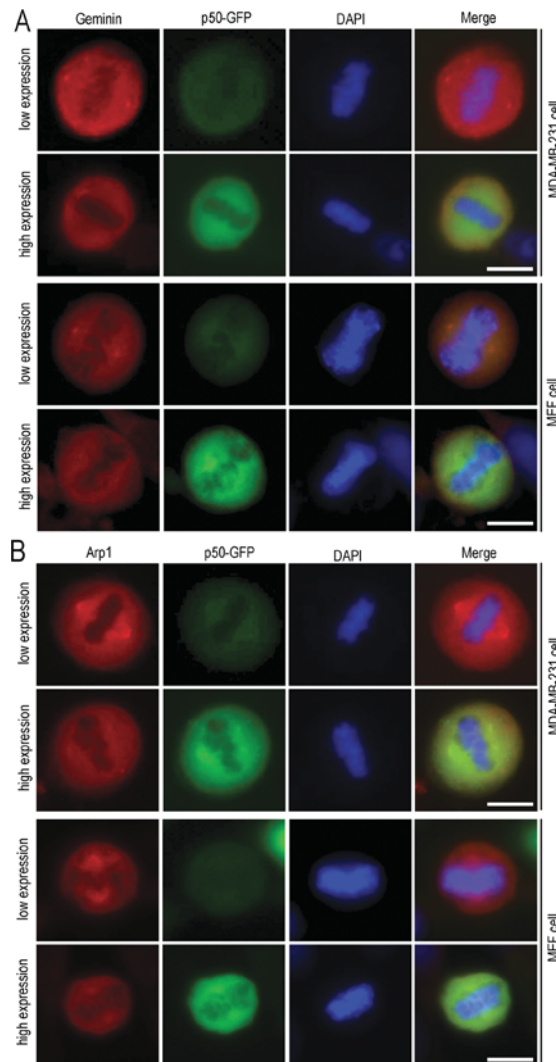

Received 1 July 2008/8 September 2008; accepted 18 September 2008

Published as Immediate Publication 18 September 2008, doi:10.1042/BC20080109
